# Supplementary material
Source: PubMed Central journal article supplement (PMC9107062)
Supplement: jama-e227319-s001.pdf [file jama-e227319-s001.pdf]

## Supplemental Online Content

Dorabawila V, Hoefler D, Bauer U, et al. Effectiveness of the BNT162b2 vaccine among children aged 5 to 11 and 12 to 17 years in New York after the emergence of the Omicron variant. *JAMA*. Published online May 13, 2022. doi:10.1001/jama.2022.7319

### **eMethods**

**eFigure.** New Cases among Children Newly Vaccinated from December 13, 2021 to January 2, 2022

### **eReferences**

This supplemental material has been provided by the authors to give readers additional information about their work.

## eMethods

### Data Sources

Four NYS databases were linked to examine COVID-19 outcomes among children 5-17 years. The Citywide Immunization Registry (CIR) and the NYS Immunization Information System (NYSIIS) collect COVID-19 provider vaccination data for residents of New York City and the rest of NYS, respectively. The Electronic Clinical Laboratory Reporting System (ECLRS) collects all reportable COVID-19 test results. The Health Electronic Response Data System (HERDS) includes a statewide, daily electronic survey of inpatient facilities, including all new admissions with laboratory-confirmed COVID-19 and the primary reason for admission.

### Dataset construction

Vaccination registry (NYSIIS/CIR) COVID-19 data were combined and deduplicated based on first name, last name, date of birth (DOB), and ZIP code then matched to laboratory data (ECLRS) using a deterministic algorithm based on first name, last name, and DOB, and to hospital admissions (HERDS) based on initials, sex, DOB, and ZIP code. Partially and fully-vaccinated children in each age group were subtracted from the census population in the applicable age groups to arrive at the unvaccinated children count. Partially-vaccinated children in each weekly period were excluded from the analyses. Children vaccinated during a weekly period and those with one dose were considered partially-vaccinated.

COVID-19 cases include all laboratory confirmed positive nucleic acid amplification test (NAAT) or antigen results reported to ECLRS based on the most recent specimen collection date<sup>1</sup>. While some antigen tests have lower sensitivity compared to NAAT<sup>2,3,4</sup>, these are all laboratory confirmed positive tests. In NYS, about 25% of laboratory confirmed results are antigen and thus are included in all reporting and analysis. COVID-19 hospitalizations were admissions reported to HERDS. Fully-vaccinated is defined as series completion plus 14 days.

US Food and Drug Administration emergency use authorization for children 16-17 years was given on December 11, 2020, for 12-15 years on May 10, 2021 and for 5-11 years on October 29, 2021. With Advisory Committee on Immunization Practices (ACIP) approval on November 2, 2021 for children 5-11 years, the earliest period with sufficient children aged 5-11 fully-vaccinated (4.7%) was the week of December 13-19. Thus, this is the first week possible for open cohort comparisons between the two age groups.

Unvaccinated populations were estimated as census population minus partially and fully-vaccinated populations. Partially-vaccinated children were excluded from analysis -both numerators and denominators. Data management and summarization was conducted in SAS (version 9.4; SAS Institute).

### Weekly cohort analysis – *statistical methods*

Confidence intervals for incidence rate ratios (IRR) comparing vaccinated vs. unvaccinated children for the cases outcome were estimated using standard approximate Normal distribution methods.<sup>5</sup> For the outcome of hospitalizations, which were more sparse, we used the exact mid-P Fisher method<sup>6</sup>. OpenEpi was used to estimate these confidence intervals<sup>7</sup>.

### Time since vaccination analysis

This analysis included three weekly cohorts of children who completed the primary series from December 13, 2021 to January 2, 2022. The follow-up period from January 3-30 allowed observation of outcomes for a minimum of 4 weeks for each group and during period when Omicron prevalence was high. The number of children aged 5-11 years included in this analysis was higher compared to those 12-17 years, largely due to a function of when the vaccine was authorized for these age groups.

Outcomes among the three weekly cohorts were arranged into time-since-vaccination categories during the four January 3-30, 2022 follow-up weeks by combining cohorts as illustrated via colored diagonal cells in eFigure. For example, cases within  $\leq 13$  days of full-vaccination (grey shading) are children that were vaccinated between December 27-January 2 with an outcome window between January 3-9, 2022. Similarly, cases 28-34 days after full-

vaccination (light-blue shading) represented the sum of the following 3 groups: (1) persons vaccinated between December 12-19 and with cases between January 10-16;(2) persons vaccinated between December 20-26 and with cases between January 17-; and (3) persons vaccinated between December 27-January 2 and with cases between January 24-30.

Incident case rates among the vaccinated, by time-since-vaccination interval, were constructed. The numerator, cases, was the sum in each time-since-vaccination group. If we consider cases between 28-34 days, there were 3 vaccination groups (light blue) that were combined, per the colored diagonals in eFigure. The denominator is the person days of children observed fully-vaccinated during the time-since-vaccination interval and contributing to the numerator (pink shading). In the example of 28-34 days, all three weekly cohorts were vaccinated for that interval, thus total person days from the 3 weeks for children 5-11 years contributed to the denominator. Thus incidence rates for those vaccinated ( $R_V$ ) were  $R_V = \frac{\sum_{i=1}^k C_{V,i}}{\sum_{i=1}^k N_{V,i}}$ , with  $var(R_V) = \frac{\sum_{i=1}^k C_{V,i}}{(\sum_{i=1}^k N_{V,i})^2}$ , where  $i$  is the cohort,  $k$  is the number of cohorts combined,  $C_{V,i}$  is the number of cases among vaccinated cohort members, and  $N_{V,i}$  is the number of vaccinated person days observed in the cohort for the interval.<sup>5</sup>

Rates among an unvaccinated comparison group were constructed from unvaccinated rates in the same weeks contributing to a given time-since-vaccination interval, directly standardized to the person-time of those vaccinated, as follows. The directly-standardized rate for the unvaccinated ( $DSR_U$ ), was estimated as  $DSR_U = \frac{\sum_{i=1}^k N_{V,i} R_{U,i}}{\sum_{i=1}^k N_{V,i}}$ , with  $var(DSR_U) = \frac{\sum_{i=1}^k (N_{V,i})^2 R_{U,i}}{(\sum_{i=1}^k N_{V,i})^2}$ , where  $R_{U,i}$  is the unvaccinated case rate ( $\frac{C_{U,i}}{N_{U,i}}$ , cases among unvaccinated / unvaccinated persons, as calculated for the open-cohort method) and  $N_{U,i}$  is number of unvaccinated persons in a given week contributing to the interval.<sup>8,9</sup>

The incidence rate ratio (IRR) for each time-since-vaccination interval was estimated as  $IRR = \frac{DSR_U}{R_V}$ , with  $var(\ln[IRR]) = \frac{var(R_V)}{R_V^2} + \frac{var(DSR_U)}{DSR_U^2}$ , and 95% CI =  $e^{\ln(IRR) \pm 1.96\sqrt{var(\ln(IRR))}}$ .<sup>6,7</sup> The computations were implemented in Excel.

**eFigure: New Cases among Children Newly Vaccinated from December 13, 2021 to January 2, 2022<sup>a</sup>**

| Cohort             | Person Days Newly Vaccinated | Follow Up Week |           |           |           |
|--------------------|------------------------------|----------------|-----------|-----------|-----------|
|                    |                              | Jan 3 – 9      | Jan 10-16 | Jan 17-23 | Jan 24-30 |
| <b>5-11 Years</b>  |                              |                |           |           |           |
| Dec 13-19          | $N_{V,i}$                    | $C_{V,i}$      | $C_{V,i}$ | $C_{V,i}$ | $C_{V,i}$ |
| Dec 20-26          | $N_{V,i}$                    | $C_{V,i}$      | $C_{V,i}$ | $C_{V,i}$ | $C_{V,i}$ |
| Dec 27-Jan 2       | $N_{V,i}$                    | $C_{V,i}$      | $C_{V,i}$ | $C_{V,i}$ | $C_{V,i}$ |
| <b>12-17 Years</b> |                              |                |           |           |           |
| Dec 13-19          | $N_{V,i}$                    | $C_{V,i}$      | $C_{V,i}$ | $C_{V,i}$ | $C_{V,i}$ |
| Dec 20-26          | $N_{V,i}$                    | $C_{V,i}$      | $C_{V,i}$ | $C_{V,i}$ | $C_{V,i}$ |
| Dec 27-Jan 2       | $N_{V,i}$                    | $C_{V,i}$      | $C_{V,i}$ | $C_{V,i}$ | $C_{V,i}$ |

<sup>a</sup> Days since full vaccination are indicated in background color: Grey: <=13 days, Orange: 14-20 days, Yellow: 21-27 days, Light-blue: 28-34 days, Green: 35-41 days, Dark-blue: 42-48 days. Person days is shaded in pink.

## eReferences

1. Rosenberg ES, Holtgrave DR, Dorabawila V, et al. New COVID-19 Cases and Hospitalizations Among Adults, by Vaccination Status—New York, May 3–July 25, 2021. *MMWR Morb Mortal Wkly Rep* 2021;70:1306–11. doi: [https://doi.org/10.15585/mmwr.mm7037a7external icon](https://doi.org/10.15585/mmwr.mm7037a7external%20icon) PMID:34529645
2. US Food and Drug Administration. Omicron Variant: Impact on Antigen Diagnostic Tests (As of 12/28/2021). SARS-CoV-2 Viral Mutations: Impact on COVID-19 Tests. <https://www.fda.gov/medical-devices/coronavirus-covid-19-and-medical-devices/sars-cov-2-viral-mutations-impact-covid-19-tests#omicronvariantimpact>.
3. Soni A, Herbert C, Filippaios A, Broach J at al. Comparison of Rapid Antigen Tests' Performance between Delta (B.1.61.7; AY.X) and Omicron (B.1.1.529; BA1) Variants of SARS-CoV-2: Secondary Analysis from a Serial Home Self-Testing Study. medRxiv. 2022 Mar 2:2022.02.27.22271090. doi: 10.1101/2022.02.27.22271090.
4. Osterman A, Badell I, Basara E, et al. Impaired detection of omicron by SARS-CoV-2 rapid antigen tests. *Med Microbiol Immunol*. 2022 Feb 20:1-13. doi: 10.1007/s00430-022-00730-z
5. Lash TL, VanderWeele TJ, Haneuse S, Rothman KJ. *Modern Epidemiology* (4th ed.). Philadelphia, PA: Wolters Kluwer; 2021
6. Martin DO, Austin H. Exact estimates for a rate ratio. *Epidemiology*. 1996 Jan;7(1):29-33. doi: 10.1097/00001648-199601000-00006. PMID: 8664397.
7. Dean AG, Sullivan KM, Soe MM. OpenEpi: Open Source Epidemiologic Statistics for Public Health, Version. [www.OpenEpi.com](http://www.OpenEpi.com), updated 2013/04/06, accessed 2022/04/11.
8. Direct Standardization. [https://www.statsdirect.com/help/rates/standardize\\_compare\\_two\\_rates.htm](https://www.statsdirect.com/help/rates/standardize_compare_two_rates.htm).. Accessed on February 9, 2022.
9. Chiang CL. Standard error of the age-adjusted death rate. US Department of Health, Education and Welfare: Vital Statistics Special Reports 1961;47:271-285.
